# Supplementary material for: Contribution of multi-metal oxides based on SrMnO 3 for the enhanced formation of Ov on chlorobenzene degradation: performance and mechanism
Source: Research Square preprint supplement (doi:10.21203/rs.3.rs-5995427/v1), 2025-04-23
Supplement: Supplementary file 1 [file 8b8585d7890cb5e97d2e2845.docx]

**Text S1**

An X-ray diffractometer (XRD; XD6, Beijing Puxi General Instrument Co., Ltd, China) equipped with a Cu Kα radiation source was used to analyse the crystal structure of the catalyst. The scanning speed was 2°min–1 and the scanning range was from 10° to 80°. X-ray photoelectron spectroscopy (XPS; K-Alpha, Thermo Scientific, USA) was measured using an Al K α radiation source (hν=1486.6 eV) to analyse the elemental composition and elemental valence of the catalysts. The surface microstructure of the catalytic materials was observed by emission scanning electron microscopy (SEM; Sigma 300, Zeiss, Germany) and transmission electron microscopy (TEM) and a field emission transmission electron microscope (Talos F200x G2, FEI, USA) equipped with EDS super-X was used to describe the desperation of the elements to obtain energy dispersive X-ray spectra. The redox properties, the number of acid sites, and the oxygen species content of the materials were tested using a programmed temperature-raising chemisorption analyser (H2-TPR, NH3-TPD, O2-TPD; Micromeritics AutoChem II 2920, USA).

**Text S2**

As shown in Fig. S2, the N2-adsorption-desorption isotherms and pore size distributions of the prepared catalytic materials. With the increase of Ce doping ratio, the specific surface area of the catalytic materials increased from 37.46 m2 g–1 to 135.16 m2 g–1, which showed a gradual increasing trend, except for SCM-4, it was speculated that due to the increase of Ce content the amount of CeO2 was also increasing, which led to a part of CeO2 blocking the pore size and resulting in a decrease in the specific surface area; among them, the pore volume of SCM-0 was the largest one in the series, followed by SCM-1; the average pore size of SCM-1 was 1.5 m2 g–1, followed by SCM-1; the average pore size of SCM-1 was 1.5 m2 g–1. The pore volume of SCM-0 is the largest in the series of materials, followed by SCM-1; the average pore size of SCM-1 is 11.37 nm, and the average pore sizes of the other five materials are all less than 10 nm, as shown in Table S2. Combined with the data from the catalytic combustion activity test, the specific surface area, pore volume and average pore size are not the decisive factors affecting the performance of catalytic materials.

**Text S3**

0.100 g of chlorobenzene solution was added dropwise to a 10 mL volumetric flask containing methanol, and the volume was fixed to the scale. Adjust the gas chromatography to the working mode, use the micro injection needle to draw 1μL of solution from the volumetric flask, diffuse in a 100 mL glass syringe for 1h and then advance from the inlet port of the chromatography, at this time, the peak area of the chromatography appeared in the concentration of chlorobenzene represented by 1000mg m–3 Repeat the above operation, and continue to draw up the solution of 2μL, 4μL, 6μL, 8μL, 10μL, and the concentration of chlorobenzene was 2000 mg m–3, 4000 mg m–3, 6000 mg m–3, 8000 mg m–3, and 10000 mg m–3, and the concentration of the chlorobenzene was measured. The peak areas of 2000 mg m–3, 4000 mg m–3, 6000 mg m–3, 8000 mg m–3, and 10000 mg m–3 were measured, and a line was plotted on the basis of the obtained data. The concentration of chlorobenzene in the gas before and after the subsequent treatment by the catalyst performance evaluation device can be deduced from the labelled line and the corresponding peak area.

**Text S4**

The mineralisation rate in a catalytic combustion process is usually calculated as follows: Mineralisation rate = Ratio of the amount of carbon in the generated carbon dioxide to the total amount of carbon in the original chlorobenzene × 100 %. The details are as follows:

Measurement of the amount of carbon in the generated carbon dioxide: The amount of carbon dioxide generated is detected by the methane converter in the GC. Determine the total amount of carbon in the original chlorobenzene and the amount of carbon in the generated CO2. Calculate the mineralisation rate: After obtaining the above two data, divide the amount of carbon in the generated CO2 by the total amount of carbon in the original chlorobenzene and multiply by 100% to obtain the mineralisation rate.

**Text S5**

The following Figure S9 shows the O2 desorption in O2-TPD.The O2 desorption from the Oads and Olatt peaks of the SCM-0 material is 0.06 mmol g–1 and 0.23 mmol g–1, respectively, and similarly the O2 desorption from the Oads and Olatt peaks of the SCM-2 material is 0.18 mmol g–1 and 0.09 mmol g–1, respectively. The modified SCM-2 material shows an increase in Oads/Olatt ratio, indicating that the amount of lattice oxygen is reduced, which means that more oxygen is constructed. The Oads/Olatt ratios of the modified SCM-2 material increased, indicating that the amount of lattice oxygen was reduced, and more oxygen vacancies were constructed (in agreement with the O 1s data in XPS), which facilitated the CB adsorption and oxidation.

**Text S6**

In the SCM-2 multi-metal catalytic combustion system for CB degradation, the reaction mechanism involves the synergistic effect of Sr-Ce-Mn, overcoming the high stability of the C-Cl bond in chlorobenzene molecules and the poisoning effect of chlorine on the catalyst. The entire process can be summarized into four key stages: adsorption activation of chlorobenzene, ring-opening oxidation of the benzene ring, removal of chlorine species and anti-poisoning mechanisms, and maintenance of the catalytic cycle(Salcedo et al., 2021).

Firstly, chlorobenzene molecules are activated through adsorption at surface sites. Ce4+ and Mn4+, as Lewis acidic sites (Ce4+/Mn4+), preferentially adsorb the π-electron system of the benzene ring via electrostatic interactions(Yang et al., 2023), causing the electron cloud of the benzene ring to shift towards the catalyst surface, resulting in polarization of the C-Cl bond and forming a surface-adsorbed state (C6H5Cl*). At the same time, the basic sites of Sr2+ promote the adsorption and dissociation of O2, generating reactive oxygen species (O–、O2–) that provide the oxygen source for subsequent oxidation.

The breaking of the C-Cl bond primarily occurs through two pathways: one is the oxygen vacancy (OVs) near Ce3+ as an active site that weakens the C-Cl bond through electron transfer (Cl– tends to bond with Ce4+), promoting the cleavage of the C-Cl bond and generating C6H5* and Cl–(Salcedo et al., 2021); the other is the direct attack of the Cl atom by the oxidation states of Mn3+/Mn4+, facilitating the departure of Cl–. In this process, the oxygen storage capability of CeO2 plays a key role, as its lattice oxygen (O2–) can dynamically release and participate in the reaction under oxygen-deprived conditions, while the surface-adsorbed oxygen continuously replenishes reactive oxygen species through the redox cycle (Ce4+/Ce3+ conversion).

Subsequently, the benzene radical intermediates generated from bond cleavage enter the deep oxidation stage. The redox cycle of Mn4+/Mn3+ drives the generation of hydroxyl radicals and superoxide radicals, which attack the benzene ring structure, triggering the ring-opening reaction. The intermediate benzene compounds (such as phenols) are further oxidized into carboxylic acids (such as maleic acid). These products are further oxidized under the synergistic action of Ce-Mn, with CeO2 adsorbing gas-phase oxygen molecules via oxygen vacancies and dissociating them into active oxygen(Duan et al., 2025), promoting the complete mineralization of small organic molecules (such as aldehydes and carboxylic acids) into CO2 and H2O. Meanwhile, Ce4+/Ce3+ replenishes reactive oxygen through its strong oxygen storage capability, maintaining the oxidative chain reaction. During this phase, the basic sites of Sr also optimize the desorption process by adsorbing products like CO₂, preventing excessive accumulation of intermediate products(Ye et al., 2024).

For the treatment of chlorine, the system prevents catalyst poisoning through multiple mechanisms. The Cl– generated from dechlorination is first captured by the oxygen vacancies of CeO2, forming a Ce-Cl bond (CeOCl) to temporarily fix the Cl–and prevent it from poisoning the Mn active sites. Meanwhile, the basic sites of SrO neutralize the acidic Cl– and release gaseous HCl through desorption at high temperatures. Notably, Sr’s role in stabilizing the crystal structure, the self-repairing ability of CeO2's oxygen vacancies (through the Ce4+/Ce3+ dynamic equilibrium), and the oxidation of Cl in CeOCl to Cl2 by Mn4+ at high temperatures all work together to ensure the long-term stability of the catalyst in chlorine-containing environments.

(1)

The synergistic effect of Sr-Ce-Mn maintains the catalytic cycle. Ce3+ reacts with gaseous O2 to regenerate oxygen vacancies. Meanwhile, Sr2+ stabilizes the lattice structure, preventing the excessive consumption of oxygen vacancies that could lead to catalyst deactivation. The redox cycles of Mn4+/Mn3+ and Ce4+/Ce3+ synergistically transfer electrons, maintaining the charge balance on the catalyst surface during reactions.

(2)

Throughout the reaction process, the functions of the components are highly coordinated: CeO₂ acts as an oxygen buffer and chlorine capture center, MnOx dominates the initiation and transfer of the oxidation reaction chain, while Sr maintains system stability through acid-base adjustment and structural support. This synergistic effect not only significantly reduces the activation energy for chlorobenzene degradation (especially showing excellent performance in the 300-400℃ range) but also solves the common problems of low-temperature activity and catalyst deactivation in catalytic combustion of chlorine-containing organic compounds through dynamic oxygen supply, electron transfer, and interface effects.

**Text S6**

The EPR spectra (now included as Figure S6 in the revised supportmentary data) exhibited a distinct signal, which is a characteristic signature of unpaired electrons localized at OVs sites. This observation provides direct experimental evidence for the presence of OVs in the SCM-2.The intensity of the EPR signal is significantly enhanced in the Ce-rich catalyst (e.g., SCM-2 sample), consisting with the proposed mechanism that Ce3+ species (generated via Ce4+ reduction during calcination or reaction) promote the formation of OVs, which was corresponded to the reported study that Ce4+/Ce3+ redox couples would modulate oxygen vacancy density in ceria-based materials (Su et al., 2020; Wang et al., 2021)

**Text S7**

The results demonstrated high consistency across all phases: Component Sr exhibited an aver-age content of 40.93% with a variance of 0.002 (measurements: 40.9, 41.0, 40.9), Component Ce showed an average of 38.47% with a variance of 0.016 (measurements: 38.3, 38.5, 38.6), and Component Mn displayed a constant value of 0.030% (measurements: 0.03, 0.03, 0.03) with zero variance, confirming its exceptional stability. These data, now included in Table S4 of the revised supportmentary data, underscores the precise control over the catalyst’s phase distribution. Your suggestion has significantly strengthened the technical rigor of our analysis, and we sincerely appreciate your insightful input.

**Text S8**

To exclude the influence of surface area, the specific reaction rate constant (Rs) of the cata-lysts was calculated and it was found that the specific surface area has some influence on re-action efficiency. The SCM-0 material had the smallest specific surface area and the number of active sites is small. At a certain pollutant concentration, the number of pollutants treated by the active sites is the first to reach saturation, so the Rs is the biggest. Similarly, SCM-5 had a large specific surface area and possesses enough active sites to adsorb and oxidize pollutants.

**Table S1**. Proportion of precursors for series materials.

| **Sample** | **Sr(C2H3O2)2·0.5H2O/mol** | **Ce(NO3)3·6H2O/mol** | **Mn(C2H3O2)2 .4H2O)** **/mol** |
| --- | --- | --- | --- |
| **SCM-0** | 0.1 | 0 | 0.1 |
| **SCM-1** | 0.08 | 0.02 | 0.1 |
| **SCM-2** | 0.06 | 0.04 | 0.1 |
| **SCM-3** | 0.04 | 0.06 | 0.1 |
| **SCM-4** | 0.02 | 0.08 | 0.1 |
| **SCM-5** | 0 | 0.1 | 0.1 |

**Table S2.** Specific surface area, pore volume and average pore size of the series of materials.

| **Sample** | **SBET(m2 g**–**1)** | **Pore volume(cm2 g**–**1)** | **Average pore size(nm)** |
| --- | --- | --- | --- |
| **SCM-0** | 37.46 | 0.0487 | 5.23 |
| **SCM-1** | 60.59 | 0.2213 | 11.37 |
| **SCM-2** | 76.76 | 0.1711 | 7.50 |
| **SCM-3** | 97.60 | 0.2181 | 7.08 |
| **SCM-4** | 91.37 | 0.2006 | 7.55 |
| **SCM-5** | 135.16 | 0.4166 | 9.45 |

**Table S3.** The performance comparison of different catalysts.

| **Catalyst** | **Pollutant** | **Parameter** | **T50**  **(℃)** | **T90**  **(℃)** | **Ref** |
| --- | --- | --- | --- | --- | --- |
| SCM-0 | C6H5Cl | 0.1 g catalyst  100 mL min–1 | 194 | 274 | This work |
| SCM-2 | C6H5Cl | 0.1 g catalyst  100 mL min–1 | 171 | 247 | This work |
| GdMnO3 | C4H10O2 | 0.05 g catalyst  50 mL min–1 | 223 | 347 | (Guo et al., 2020) |
| LaCo0.2Mn0.8O3 | C3H8 | 0.2 g catalyst  200 mL min–1 | 307 | 355 | (Zhu et al., 2020) |
| LMO/SiO2-WI | C4H11N | 1.0 g catalyst  250 mL min–1 | 230 | 305 | (Chen et al., 2019) |
| LCB-5 | C3H8 | 0.1 g catalyst  100 mL min–1 | 322 | 449 | (Zheng et al., 2021) |
| LaMnO3 | C3H8 | 0.1 g catalyst  50 mL min–1 | 275 | 313 | (Miniajluk et al., 2017) |
| NiCeOx | C3H8 | 0.2 g catalyst  100 mL min–1 | 276 | 313 | (Hu et al., 2018) |
| La0.5Ca0.5CoO3 | C3H8 | 0.3 g catalyst  100 mL min–1 | 267 | 333 | (Merino et al., 2005) |

**Table S4.** Composition Analtsis of the Multi-Mental Ccatalyst.

| **Component** | **Measurement 1 (%)** | **Measurement 2(%)** | **Measurement 3(%)** | **Mean ± SD (%)** | **Variance(σ2)** |
| --- | --- | --- | --- | --- | --- |
| **Sr** | 0.03 | 0.03 | 0.03 | 0.03 ± 0.00 | 0.002 |
| **Ce** | 40.9 | 41.0 | 40.9 | 40.93 ± 0.05 | 0.016 |
| **Mn** | 38.3 | 38.5 | 38.6 | 38.47 ± 0.13 | 0.000 |


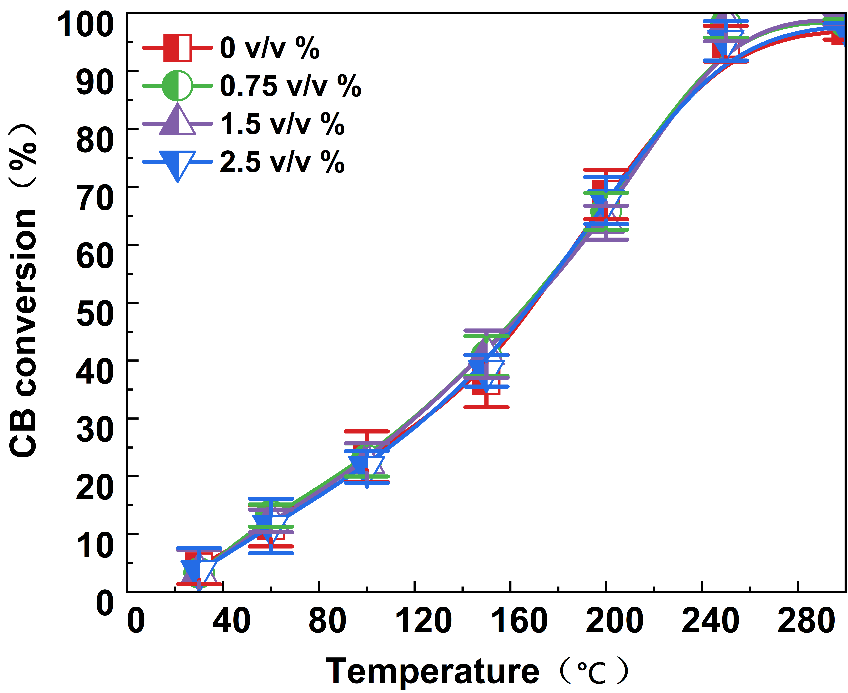


**Fig.S1.** Cyclic test experiment of SCM-2.


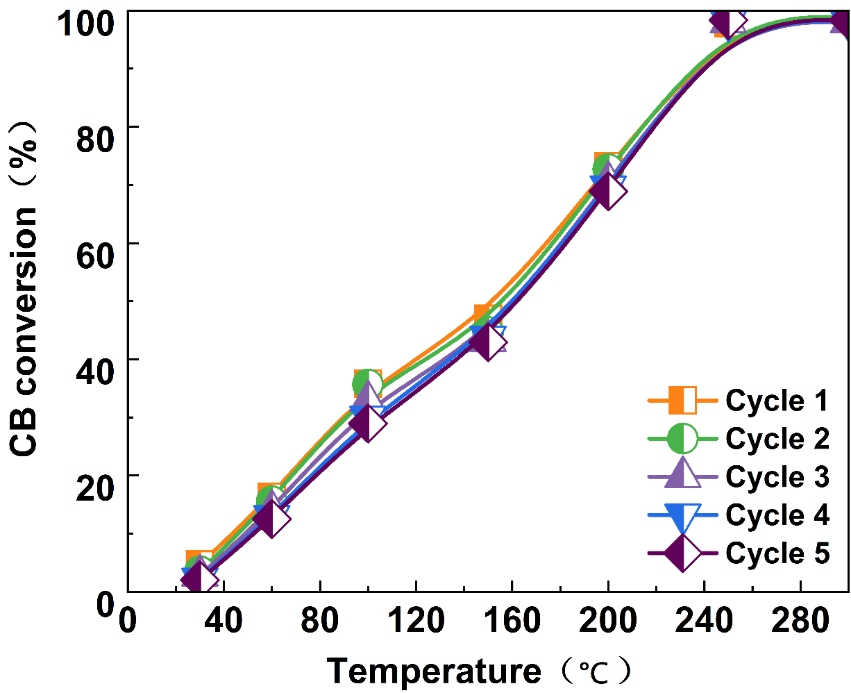


**Fig.S2.** Cyclic test experiment of SCM-2.


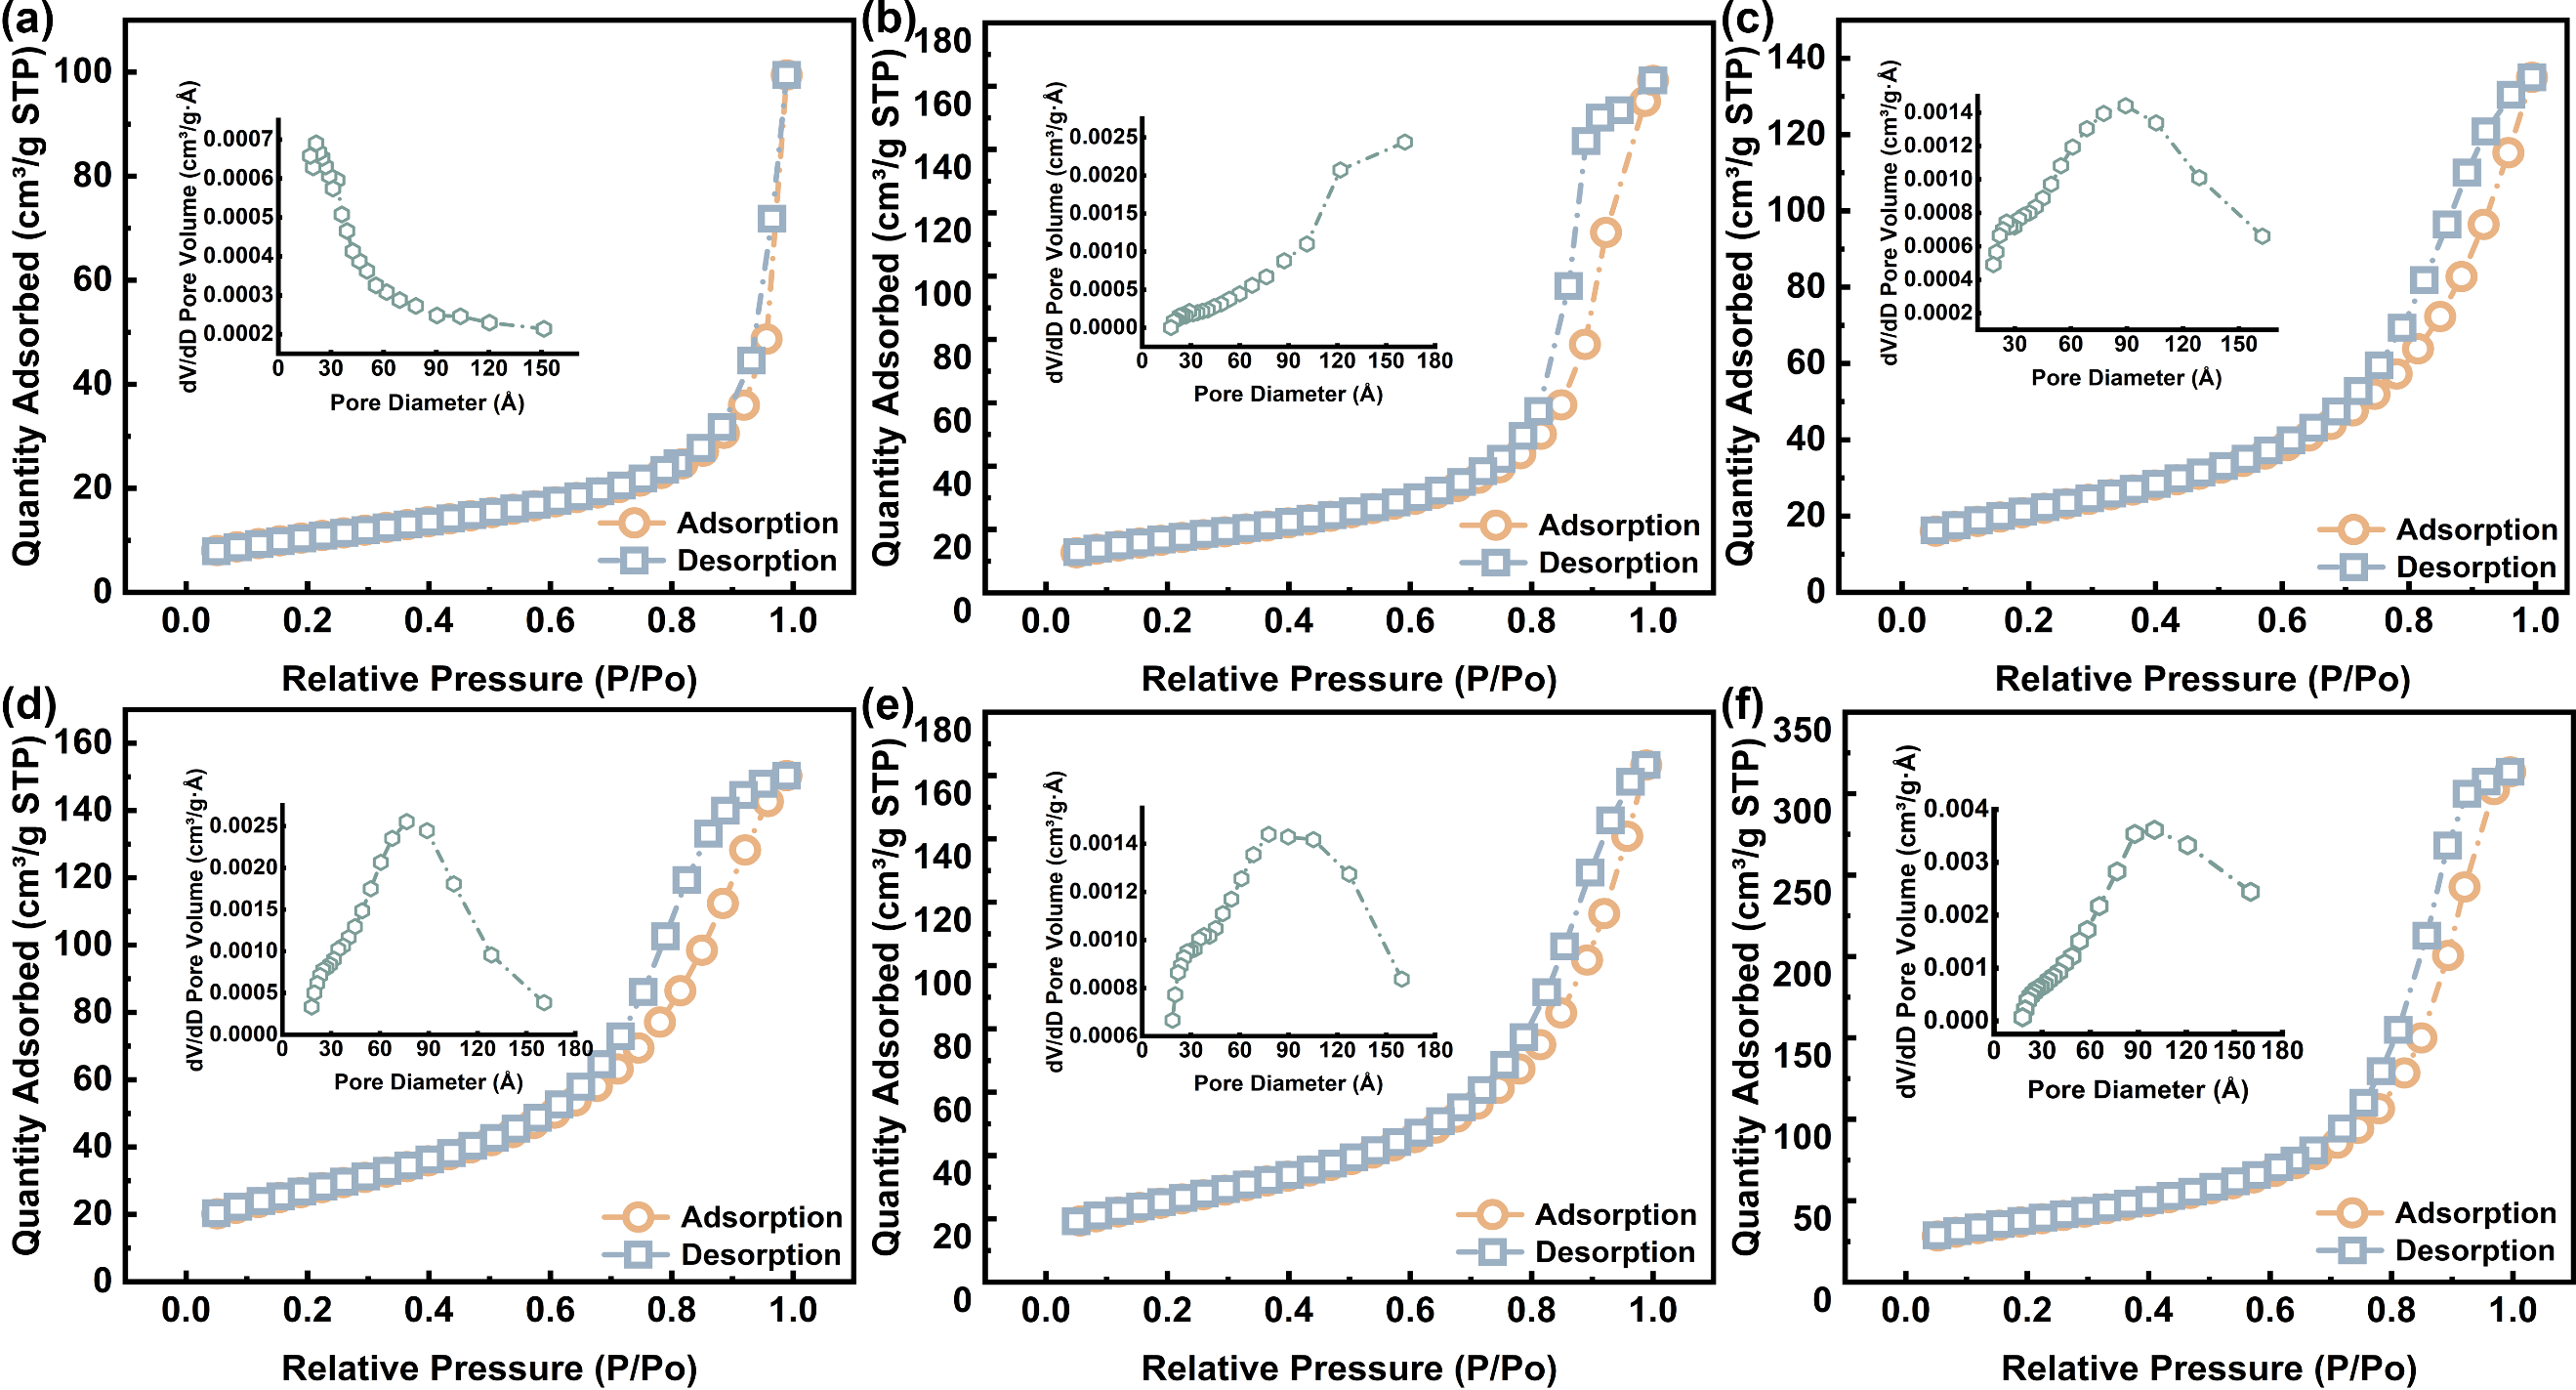


**Fig. S3.** N2 adsorption-desorption isotherms and BJH pore size distributions for the series of materials.


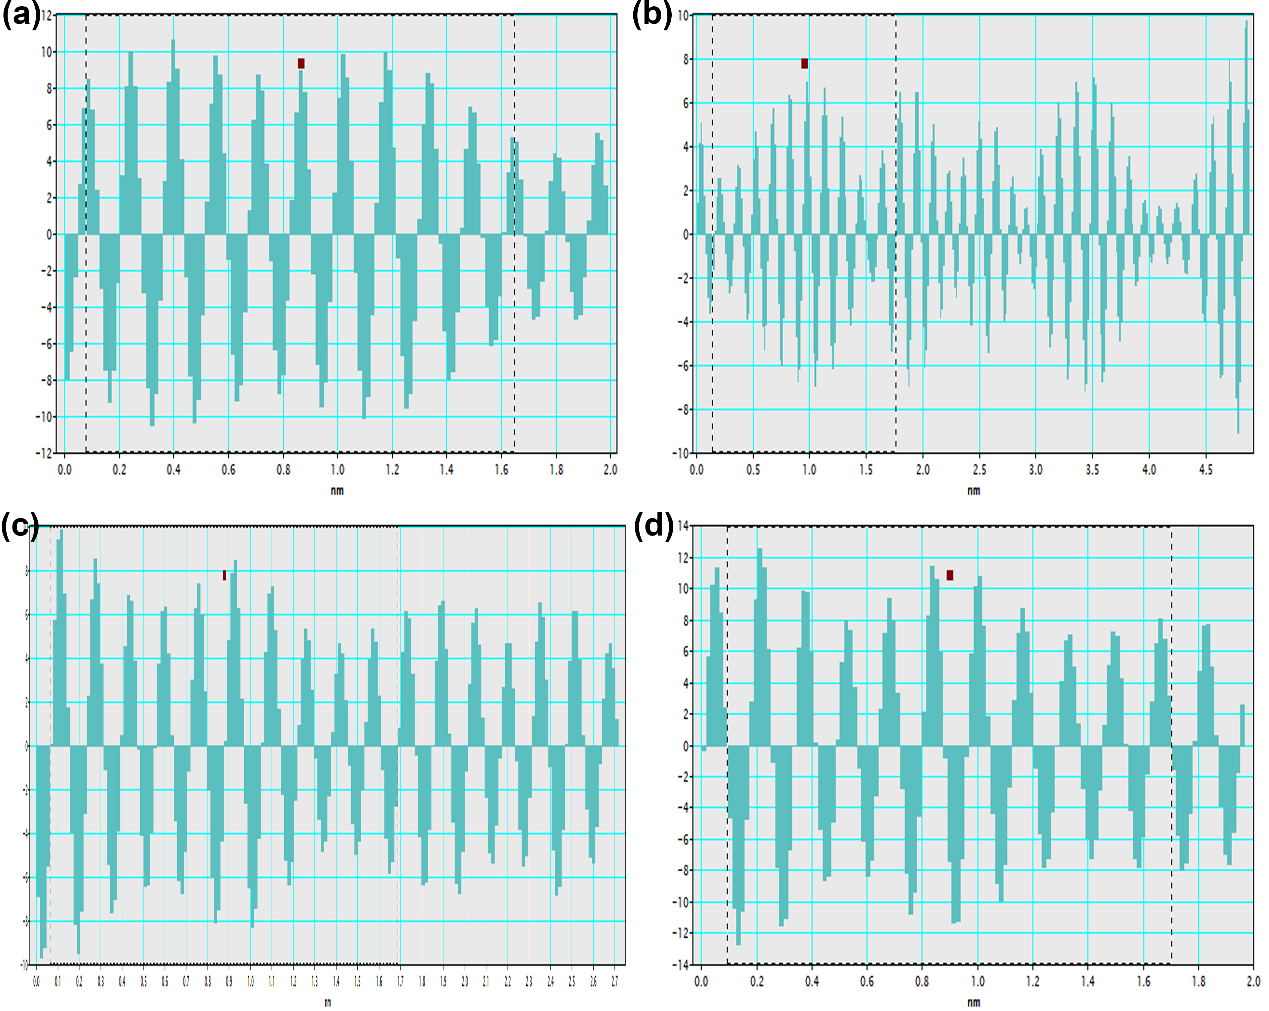


**Fig. S4.** Profile of HRTEM of Fig. 2 (d, e, h, i)**.**


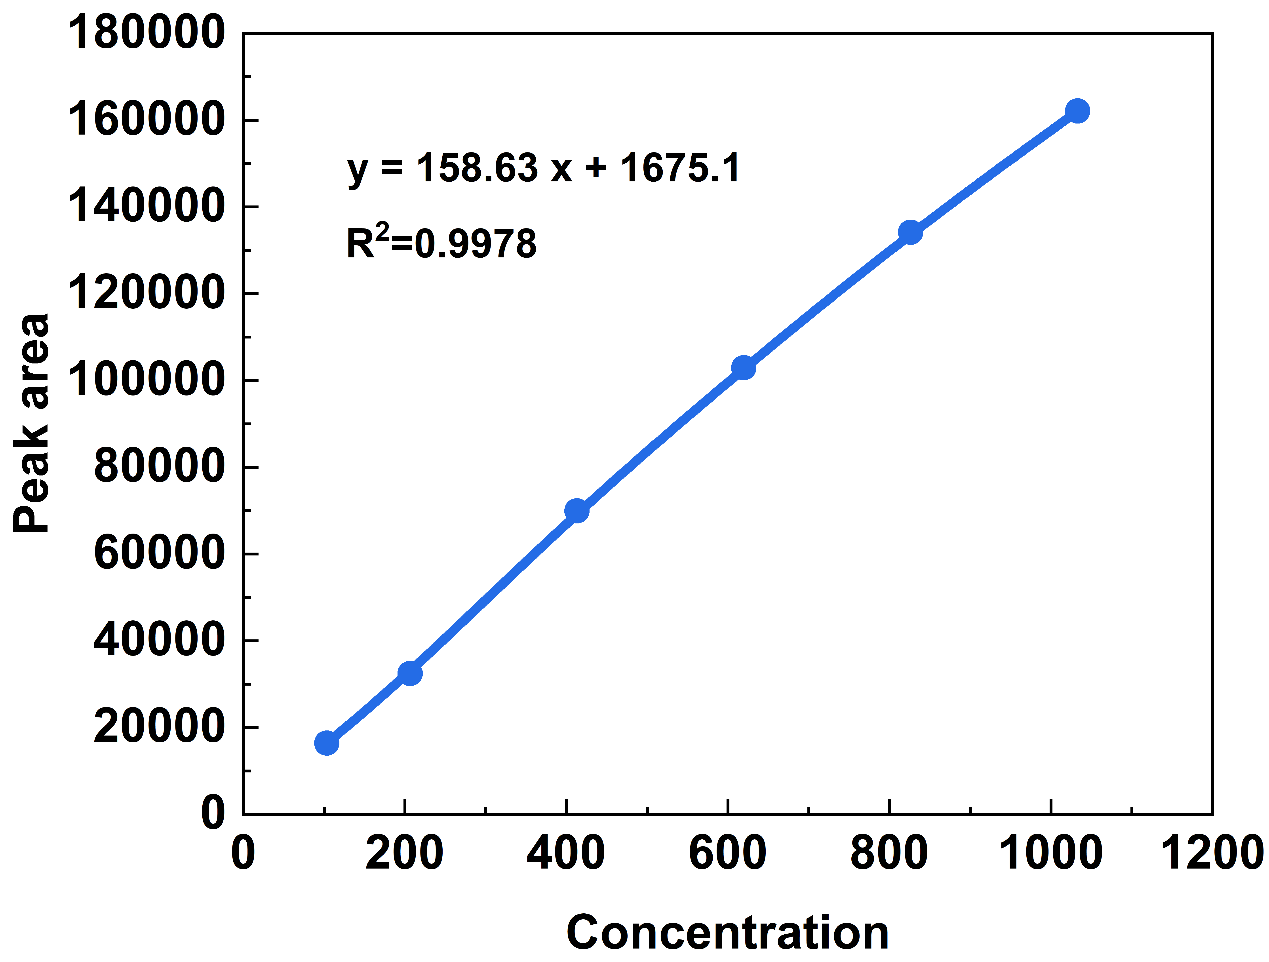


**Fig. S5.** Standard curves for performance tests.


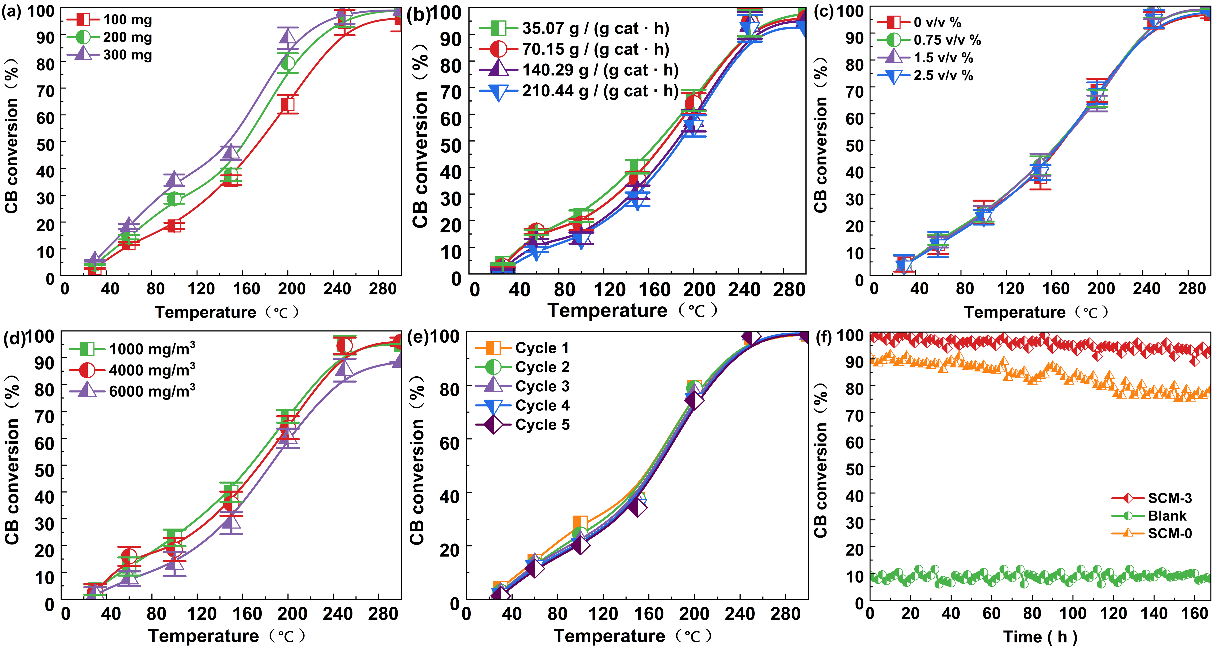


**Fig. S6.** Performance test data of SCM-3 under different working conditions.

**
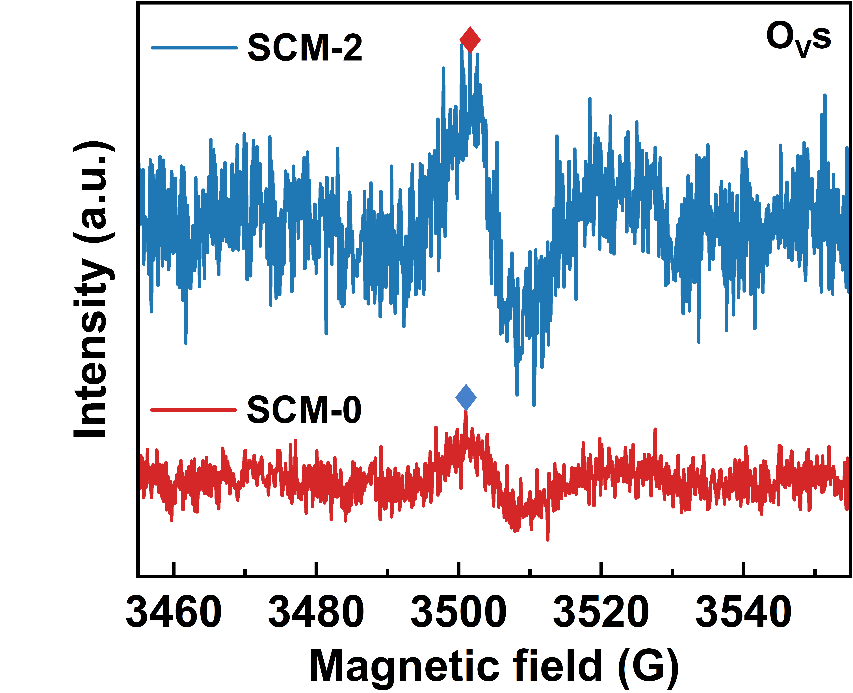
**

**Fig. S7.** EPR spectra of SCM-0 and SCM-2.

**
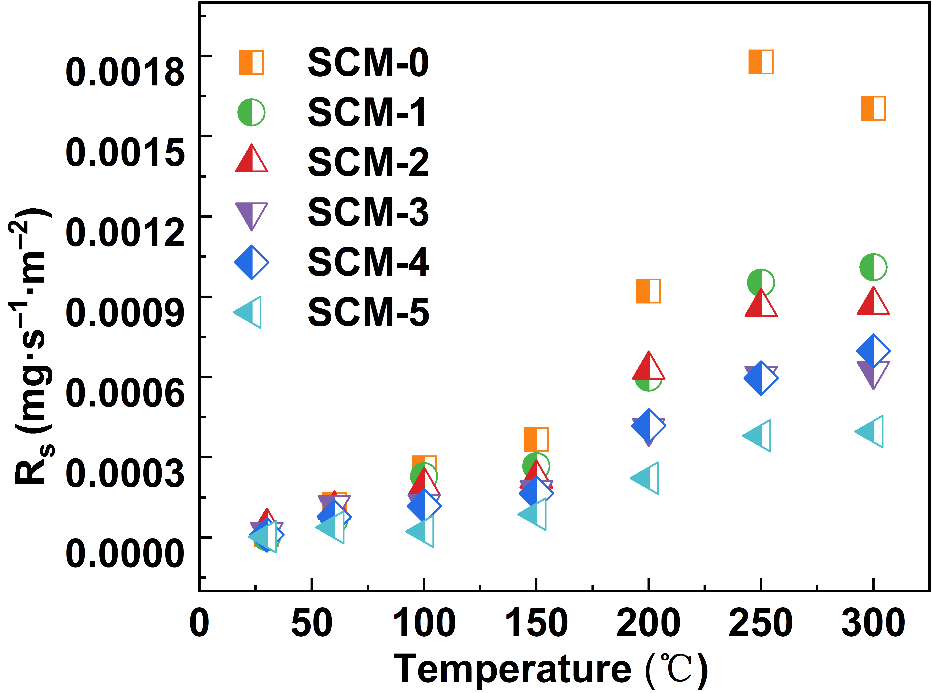
**

**Fig. S8.** Rs of different catalysts.


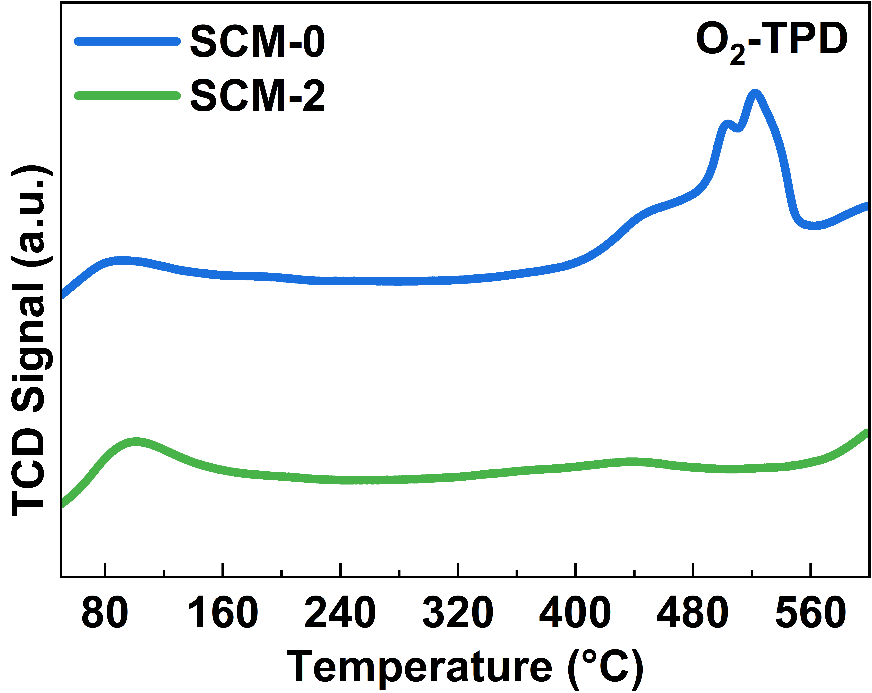


**Fig. S9.** O2-TPD of SCM-0 and SCM-2.

Chen, H., Yang, Y., Liu, Q., Cui, M., Chen, X., Fei, Z., Tao, Z., Wang, M., Qiao, X. (2019). A citric acid-assisted deposition strategy to synthesize mesoporous SiO2-confined highly dispersed LaMnO3 perovskite nanoparticles for n-butylamine catalytic oxidation. RSC Advances 9, 8454-8462. <https://doi.org/10.1039/C8RA10636C>

Duan, X., Niu, B., Wang, Y., Yang, Z., Ren, H., Li, G., Wei, Z., Cheng, J., Zhang, Z., Hao, Z. (2025). Regulating the Electronic Metal–Support Interaction of Single-Atom Ruthenium Catalysts for Boosting Chlorobenzene Oxidation. Environmental Science & Technology 59, 7408-7418. <https://doi.org/10.1021/acs.est.5c00299>

Guo, M., Li, K., Zhang, H., Min, X., Hu, X., Guo, W., Jia, J., Sun, T. (2020). Enhanced catalytic activity of oxygenated VOC deep oxidation on highly active in-situ generated GdMn2O5/GdMnO3 catalysts. Journal of Colloid and Interface Science 578, 229-241. <https://doi.org/https://doi.org/10.1016/j.jcis.2020.05.095>

Hu, Z., Qiu, S., You, Y., Guo, Y., Guo, Y., Wang, L., Zhan, W., Lu, G. (2018). Hydrothermal synthesis of NiCeOx nanosheets and its application to the total oxidation of propane. Applied Catalysis B: Environmental 225, 110-120. <https://doi.org/https://doi.org/10.1016/j.apcatb.2017.08.068>

Merino, N.A., Barbero, B.P., Grange, P., Cadús, L.E. (2005). La1−xCaxCoO3 perovskite-type oxides: preparation, characterisation, stability, and catalytic potentiality for the total oxidation of propane. Journal of Catalysis 231, 232-244. <https://doi.org/https://doi.org/10.1016/j.jcat.2005.01.003>

Miniajluk, N., Trawczyński, J., Zawadzki, M. (2017). Properties and catalytic performance for propane combustion of LaMnO3 prepared under microwave-assisted glycothermal conditions: Effect of solvent diols. Applied Catalysis A: General 531, 119-128. <https://doi.org/https://doi.org/10.1016/j.apcata.2016.10.026>

Salcedo, A., Lustemberg, P.G., Rui, N., Palomino, R.M., Liu, Z., Nemsak, S., Senanayake, S.D., Rodriguez, J.A., Ganduglia-Pirovano, M.V., Irigoyen, B. (2021). Reaction Pathway for Coke-Free Methane Steam Reforming on a Ni/CeO2 Catalyst: Active Sites and the Role of Metal–Support Interactions. ACS Catalysis 11, 8327-8337. <https://doi.org/10.1021/acscatal.1c01604>

Yang, C., Gao, Y., Ma, T., Bai, M., He, C., Ren, X., Luo, X., Wu, C., Li, S., Cheng, C. (2023). Metal Alloys-Structured Electrocatalysts: Metal–Metal Interactions, Coordination Microenvironments, and Structural Property–Reactivity Relationships. Advanced Materials 35, 2301836. <https://doi.org/https://doi.org/10.1002/adma.202301836>

Ye, R., Ma, L., Hong, X., Reina, T.R., Luo, W., Kang, L., Feng, G., Zhang, R., Fan, M., Zhang, R., Liu, J. (2024). Boosting Low-Temperature CO2 Hydrogenation over Ni-based Catalysts by Tuning Strong Metal-Support Interactions. Angewandte Chemie International Edition 63, e202317669. <https://doi.org/https://doi.org/10.1002/anie.202317669>

Zheng, Y., Chen, Y., Wu, E., Liu, X., Huang, B., Xue, H., Cao, C., Luo, Y., Qian, Q., Chen, Q. (2021). Amorphous Boron Dispersed in LaCoO3 with Large Oxygen Vacancies for Efficient Catalytic Propane Oxidation. Chemistry – A European Journal 27, 4738-4745. <https://doi.org/https://doi.org/10.1002/chem.202004848>

Zhu, W., Chen, X., Liu, Z., Liang, C. (2020). Insight into the Effect of Cobalt Substitution on the Catalytic Performance of LaMnO3 Perovskites for Total Oxidation of Propane. The Journal of Physical Chemistry C 124, 14646-14657. <https://doi.org/10.1021/acs.jpcc.0c03084>
